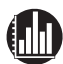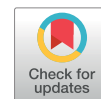

# Influence of Renin-Angiotensin System Inhibitors on Lower-Respiratory Tract Infections in Type 2 Diabetes: The Fremantle Diabetes Study Phase II

Timothy M.E. Davis and Wendy A. Davis

Diabetes Care 2020;43:2113–2120 | <https://doi.org/10.2337/dc20-0895>

## OBJECTIVE

To determine whether ACE inhibitors (ACEi) and angiotensin receptor blockers (ARB) protect against lower-respiratory tract infections complicating type 2 diabetes.

## RESEARCH DESIGN AND METHODS

Of 1,732 participants with diabetes recruited to the longitudinal observational Fremantle Diabetes Study Phase II (FDS2) between 2008 and 2011, 1,482 had confirmed type 2 diabetes (mean age 65.8 years and median diabetes duration 9.0 years; 51.6% were male). All were followed for hospitalizations for or with, or deaths from, pneumonia/influenza, ascertained from validated administrative data linkage from study entry to end of 2016. Cox regression and competing risk regression were used to identify independent predictors of this outcome.

## RESULTS

Two-thirds of participants ( $n = 982$ ) were taking an ACEi and/or ARB at study entry (498 [33.6%] ACEi, 408 [27.5%] ARB, 76 [5.1%] both). During 9,511 person-years of follow-up (mean  $\pm$  SD  $6.4 \pm 2.0$  years), 174 participants had incident pneumonia/influenza (156 hospitalizations and 18 deaths without hospitalization). In Cox regression analysis, baseline ACEi/ARB use was independently associated with a reduced risk of incident pneumonia/influenza (cause-specific hazard ratio [HR] 0.64 [95% CI 0.45, 0.89],  $P = 0.008$ ). Allowing for the competing risk of death did not change this finding (subdistribution HR 0.67 [0.48, 0.95],  $P = 0.024$ ), and similar reductions were seen for ACEi, ARB alone, and ACEi/ARB combination therapy. There was no significant change in use of ACEi/ARB during follow-up [interaction with  $\ln(\text{time})$ ,  $P = 0.70$ ]. Other significant predictors of incident pneumonia/influenza were previously reported, clinically plausible variables.

## CONCLUSIONS

ACEi/ARB reduce the risk of pneumonia/influenza in people with type 2 diabetes.

Medical School, University of Western Australia, and Fremantle Hospital, Fremantle, Western Australia, Australia

Corresponding author: Timothy M.E. Davis, [tim.davis@uwa.edu.au](mailto:tim.davis@uwa.edu.au)

Received 20 April 2020 and accepted 27 May 2020

This article contains supplementary material online at <https://doi.org/10.2337/figshare.12398024>.

© 2020 by the American Diabetes Association. Readers may use this article as long as the work is properly cited, the use is educational and not for profit, and the work is not altered. More information is available at <https://www.diabetesjournals.org/content/license>.

The weight of evidence suggests that the risk of lower–respiratory tract infections is increased in people with type 2 diabetes (1–3) and that the associated mortality is greater than in people without diabetes (4). In addition, although the incidence of the chronic vascular complications of diabetes has declined over the past two decades (5), this trend has not been observed with infections. In contrast to a steady reduction in adults without diabetes, the rate of hospitalizations for pneumonia has remained relatively stable in people with diabetes in the U.S. over recent years (6). As diabetes is a strong risk factor for the development of pulmonary complications of coronavirus disease 2019 (COVID-19) (7), this divergence should become more marked with time.

One factor that has been identified as possibly affording protection against community-acquired infections is use of drugs that inhibit the renin-angiotensin system (RAS) and thus attenuate the adverse effects of RAS-mediated oxidative stress and inflammation (8). In the case of lower–respiratory tract infections, the results of a meta-analysis suggested that ACE inhibitors (ACEi), but not angiotensin receptor blockers (ARB), protect against pneumonia in general population studies (9). However, a more recent study showed that ARB were more effective than ACEi in preventing pneumonia in people with chronic obstructive pulmonary disease (COPD) (10). One primary care–based U.K. study in people with diabetes found that ACEi prevented community-acquired pneumonia (11). There have been no equivalent studies of ARB in diabetes, but because diabetes is associated with progressive pulmonary dysfunction (12), the response to this class versus ACEi may be similar to that in COPD (10).

In view of the inconsistent and incomplete diabetes-specific data, the aim of the current study was to examine whether use of ACEi or ARB is associated with a reduction in the incidence of hospitalization for lower–respiratory tract infections in representative people with type 2 diabetes. Because there are a large number of other recognized risk factors for this type of infection (13), it is important to include possible confounding variables in assessment of the independent contribution of RAS inhibitors, a limitation of previous studies (9–11). RAS inhibitors are commonly used as antihypertensive agents

and for renoprotection in type 2 diabetes (14), but a beneficial effect on the incidence of lower–respiratory tract infections may justify their wider use.

## RESEARCH DESIGN AND METHODS

### Study Site, Participants, and Approvals

The Fremantle Diabetes Study Phase II (FDS2) is a longitudinal observational study conducted in a zip code–defined urban community of 157,000 people surrounding the city of Fremantle in the state of Western Australia (WA) (15). Socioeconomic data relating to income, employment, housing, transportation, and other variables in the study area show an average Index of Relative Socio-Economic Advantage and Disadvantage of 1,033 with a range by zip code of 977–1,113, figures similar to the Australian national mean  $\pm$  SD, which are set at  $1,000 \pm 100$  (16).

Descriptions of FDS2 recruitment, sample characteristics, and details of nonrecruited individuals with diabetes have previously been published (15). In brief, individuals resident in the catchment area with a clinician-verified diagnosis of diabetes (excluding gestational diabetes mellitus) were identified through all available hospital and community sources. Of 4,639 with known diabetes identified between 2008 and 2011, 1,668 (36.0%) were recruited to FDS2. Former FDS Phase I participants recruited between 1993 and 1996 who had moved out of the catchment area ( $n = 64$ ) were also recruited, for a total cohort of 1,732. The mean  $\pm$  SD baseline age of those recruited to the FDS2 was  $62.0 \pm 13.8$  vs.  $61.3 \pm 17.4$  years in patients identified but not recruited; 52.2% and 52.4%, respectively, were male; and 90.1% and 89.5%, respectively, had type 2 diabetes ( $P \geq 0.17$  in each case) (17).

### Study Procedures

All FDS2 participants were invited to face-to-face assessments at entry and then biennially, interspersed with biennial postal questionnaires (15). Face-to-face assessments included a standardized comprehensive questionnaire and physical examination, as well as fasting biochemical tests performed in a single nationally accredited laboratory. It was requested that participants bring all medications/prescriptions to each visit, and details were verified and recorded. Smoking, alcohol consumption, and vaccination histories were documented. BMI

was determined together with a body shape index (ABSI), which represents a more reliable estimate of visceral adiposity (18). Pulmonary function testing was performed to American Thoracic Society spirometry standards (19).

Type 2 diabetes in participants was ascertained based on diabetes treatment history (especially insulin and its initiation relative to diagnosis), BMI, age at diagnosis, nature of first presentation, and/or self-identification. Among the 1,551 with clinically defined type 2 diabetes, subsequent testing for anti-GAD antibodies and monogenic diabetes reduced this number to 1,482 with true type 2 diabetes (16). Racial/ethnic background was categorized based on self-selection, country/countries of birth and parents'/grandparents' birth, and language(s) spoken at home as Anglo-Celt, Southern European, Other European, Asian, Aboriginal, or mixed/other.

Complications of diabetes were identified using standard definitions (20). Albuminuria was assessed by early-morning spot urine albumin-to-creatinine ratio (ACR) measurement and renal impairment from the estimated glomerular filtration rate (eGFR) (21). Peripheral sensory neuropathy was defined using the clinical portion of the Michigan Neuropathy Screening Instrument. Retinopathy was defined as one microaneurysm in either eye or worse, previous laser treatment on fundus photography, or ophthalmologist assessment. Participants were classified as having coronary heart disease if there was a history of myocardial infarction, angina, coronary artery bypass grafting, or angioplasty and as having cerebrovascular disease if there was a history of stroke or transient ischemic attack. Peripheral arterial disease was defined as an ankle brachial index  $\leq 0.90$  or a diabetes-related lower-extremity amputation.

### Ascertainment of Outcomes

The Hospital Morbidity Data Collection (HMDC) contains information regarding all public/private hospitalizations in WA since 1970, while the Registry for Births, Deaths and Marriages records details of all deaths in WA (22). The FDS2 has been linked through the Western Australia Data Linkage System (WADLS) to these databases, as approved by the WA Department of Health Human Research Ethics Committee, to provide validated data on incident events to end of 2016.

The outcomes of interest during follow-up were hospitalizations for the main bacterial and viral lung parenchymal infections pneumonia or influenza using the ICD-10, Australian Modification (ICD-10-AM) codes J10–J18, which have previously been validated (23). Deaths from or with pneumonia/influenza, based on the death certificate or coroner's determination, were also identified.

The Hospital Morbidity Data Collection was used to supplement data obtained through FDS2 assessments relating to prevalent/prior disease during the 5 years prior to study entry. These data were used to calculate the Charlson comorbidity index (CCI) (24), which includes a history of myocardial infarction, heart failure, cerebrovascular disease, peripheral arterial disease, chronic pulmonary disease, rheumatic disease, peptic ulcer disease, hemiparesis or paraparesis, renal disease, liver disease, and cancer. For the purposes of the current study, we excluded conditions coded as diabetes-specific chronic complications (ICD-9, clinical modification [ICD-9-CM] 250 and ICD-10-AM E10–E14 codes).

### Statistical Analysis

The computer packages IBM SPSS Statistics 25 (IBM Corporation, Armonk, NY) and Stata/SE 15 (StataCorp, College Station, TX) were used for statistical analysis. Data are presented as proportions, mean  $\pm$  SD, geometric mean (SD range), or, when variables did not conform to a normal or log-normal distribution, median and interquartile range. For independent samples, two-way comparisons for proportions were by Fisher exact test, for normally distributed variables by Student *t* test, and for non-normally distributed variables by Mann-Whitney *U* test. Multiple logistic regression (backward stepwise conditional modeling with  $P < 0.05$  for variable entry and  $\geq 0.05$  for removal) was used to determine associates of baseline ACEi/ARB use.

Cox regression modeling was used to determine independent predictors of time to first hospitalization for or with or death from or with pneumonia/influenza. Variables were included if they were clinically plausible with a bivariable  $P < 0.20$ . They were removed one at a time, those with least statistical significance first, until all variables in the model were significant at  $P < 0.05$ . The use of ACEi/ARB at study entry was then added to the model as a binary variable (no ACEi/ARB use, ACEi/

ARB use) and as a categorical variable (no ACEi/ARB use, ACEi only, ARB only, both ACEi and ARB). Fine and Gray competing risk regression modeling was performed similarly to take account of the competing risk of death from causes other than pneumonia or influenza (25). The proportional hazards assumption was checked for each model using Schoenfeld residuals for individual covariates and globally and using time-varying covariates. Thirty-four participants (2.3%) had missing data for one or more variables in the final models. As a sensitivity analysis, the six variables with missing data were multiply imputed ( $\times 20$ ) and the analyses rerun with imputed data.

## RESULTS

### Baseline Characteristics

At study entry, the 1,482 FDS2 participants with type 2 diabetes had a mean  $\pm$  SD age of  $65.8 \pm 11.6$  years a median diabetes duration of 9.0 years (interquartile range 3.0–16.0), and 51.6% were male. Two-thirds ( $n = 982$ ) were taking an ACEi and/or ARB at study entry (498 [33.6%] ACEi, 408 [27.5%] ARB, and 76 [5.1%] both). The independent associates of baseline use of ACEi and/or ARB are shown in Table 1 (see Supplementary Table 1 for bivariable comparisons). ACEi/ARB use was associated with longer diabetes duration and higher BMI and clustered with other pharmacotherapies including lipid-modifying agents (with an additional inverse association with total serum cholesterol), calcium channel blockers, diuretics, and aspirin. There was a graded increase

in use with increasing urine albumin excretion, while participants with an eGFR  $\geq 45$  and  $< 60$  mL/min/1.73 m<sup>2</sup> were more likely to be taking ACEi/ARB than were those with an eGFR outside this range. Although participants with peripheral arterial disease were more likely to be treated with an ACEi/ARB than those without, those with a CCI  $\geq 3$  were less likely to be taking these agents than those with a lower comorbidity burden.

### Incident Pneumonia/Influenza and Changes in RAS Inhibitor Use

During 9,511 person-years of follow-up (mean  $\pm$  SD  $6.4 \pm 2.0$  years) to first incident hospitalization for or with pneumonia or influenza, death, or end of December 2016—whichever came first—174 (11.7%) participants had incident pneumonia or influenza (156 hospitalizations for or with pneumonia/influenza and 18 deaths from or with pneumonia/influenza without hospitalization [crude incidence 18.3/1,000 person-years]).

The baseline characteristics of the cohort classified by incident pneumonia/influenza status are shown in Table 2. Compared with participants who remained free of lower-respiratory tract infections during follow-up in bivariable analyses, those with incident pneumonia/influenza were older and less well educated at baseline, were less likely to be married or in a de facto relationship, were less likely to be Anglo-Celt and more likely to be indigenous, and consumed less alcohol. They had longer duration of diabetes and greater abdominal obesity,

**Table 1—Odds ratios 95% CIs for independent baseline associates of ACEi/ARB use in FDS2 participants with type 2 diabetes**

|                                                | OR (95% CI)       | P      |
|------------------------------------------------|-------------------|--------|
| Lipid-modifying medication                     | 2.11 (1.58, 2.82) | <0.001 |
| Calcium channel blocker therapy                | 2.23 (1.55, 3.21) | <0.001 |
| Diuretic therapy                               | 6.68 (4.54, 9.82) | <0.001 |
| Aspirin therapy                                | 1.87 (1.41, 2.47) | <0.001 |
| Diabetes duration (increase of 1 year)         | 1.03 (1.01, 1.04) | 0.001  |
| Total serum cholesterol (increase of 1 mmol/L) | 0.83 (0.73, 0.93) | 0.002  |
| Peripheral arterial disease                    | 1.61 (1.16, 2.25) | 0.005  |
| BMI (increase of 1 kg/m <sup>2</sup> )         | 1.03 (1.00, 1.05) | 0.020  |
| eGFR 45–59 mL/min/1.73 m <sup>2</sup>          | 1.84 (1.09, 3.12) | 0.022  |
| Albuminuria category                           |                   | 0.025  |
| Normoalbuminuria (ACR <3.0 mg/mmol)            | 1.00 (reference)  |        |
| Microalbuminuria (ACR 3.0–29.9 mg/mmol)        | 1.34 (1.01, 1.78) | 0.042  |
| Macroalbuminuria (ACR $\geq 30.0$ mg/mmol)     | 1.90 (1.05, 3.44) | 0.033  |
| CCI $\geq 3$                                   | 0.58 (0.34, 0.97) | 0.040  |

OR, odds ratio.

and they were more likely to be insulin treated. They had a higher resting pulse rate and lower diastolic blood pressure, a greater urinary albumin excretion, and a lower eGFR and were more likely to have chronic vascular complications of diabetes. They were more likely to have been hospitalized with pneumonia/influenza before study entry, were more likely to have had both influenza and pneumococcal vaccinations, and had worse pulmonary function.

### Predictors of First Hospitalization With or Death From Pneumonia/Influenza

The results of the Cox regression modeling are summarized in Table 3. After adjustment for the most parsimonious model of independent associates of first incident hospitalization for or with or death from or with pneumonia or influenza, use of ACEi or ARB at baseline was associated with a significant, 36%, reduced risk of incident pneumonia/influenza (cause-specific hazard ratio [csHR] 0.64 [95% CI 0.45, 0.89],  $P = 0.008$ ). Other significant variables in the model were older age, indigenous and other European ethnicity, increasing HbA<sub>1c</sub> and ABSI, increasing heart rate and lower diastolic blood pressure, increasing urinary albumin excretion and stage 3 or 4 chronic kidney disease, proton pump inhibitor use, increased CCI, and prior hospitalization with pneumonia/influenza.

To explore whether there were differences by type of RAS inhibitor, we used categorical variables for ACEi/ARB use (i.e., no ACEi/ARB, ACEi only, ARB only, both ACEi and ARB) in the same Cox model. The respective adjusted csHRs with no ACEi/ARB use as reference were 0.66 (95% CI 0.45, 0.97) ( $P = 0.036$ ), 0.62 (0.41, 0.93) ( $P = 0.020$ ), and 0.60 (0.30, 1.17) ( $P = 0.13$ ), respectively. Taking the competing risk of death from other causes during follow-up into account attenuated the risk reduction, but it remained significant (subdistribution hazard ratio [sdHR] 0.67 [95% CI 0.48, 0.95],  $P = 0.024$ ). (See Table 3.) The proportional hazards assumption was not violated for any of the variables in the models ( $P \geq 0.31$ ) or overall ( $P = 0.65$ ).

The models using multiply imputed data produced similar results. For the Cox model, the adjusted csHR for ACEi/ARB use was 0.61 (95% CI 0.44, 0.85) ( $P = 0.003$ ), and for the competing risk model the adjusted sdHR was 0.70 (0.50, 0.98)

( $P = 0.039$ ). At biennial face-to-face assessments, similar proportions of participants were taking an ACEi or ARB compared with baseline (68.3% of 1,152 at year 2, 69.5% of 893 at year 4, and 71.3% of 739 at year 6). The binary variable ACEi/ARB use did not vary over time [interaction with  $\ln(\text{time})$ ,  $P = 0.70$ ].

### Mortality

Of the participants who had an episode of pneumonia/influenza, 88 were hospitalized and were still alive at the end of follow-up (end-2016), 68 were hospitalized but had died by end-2016, and 18 died of or with pneumonia but had no hospital admission. Of the 68 hospitalized patients who died during follow-up, the mean  $\pm$  SD time between hospitalization and death was  $586 \pm 626$  days, with no significant difference by ACEi/ARB treatment status (21 not treated,  $563 \pm 600$  days, vs. 47 treated,  $597 \pm 644$  days; Mann-Whitney  $U$  test,  $P = 0.98$ ). Three participants who were not taking ACEi/ARB (14.3%) vs. 10 who were (21.3%) died within 30 days of first hospitalization for or with pneumonia/influenza ( $P = 0.74$ ).

### CONCLUSIONS

The current study shows that use of ACEi and/or ARB was protective against hospitalization for pneumonia and influenza independently of a range of recognized risk factors over an average follow-up period of  $>6$  years in a representative, community-based cohort of people with type 2 diabetes. The two classes of RAS inhibitor therapy, whether as monotherapy or in combination, had similar effects, providing a  $\geq 30\%$  reduction in the incidence of these lower-respiratory tract infections after adjustment. The competing risk of death had only a marginal effect on the magnitude of benefit, and there was no time-dependent influence of use of ACEi/ARB medications. These data have implications for management, especially in an era in which lower-respiratory tract infections remain a major cause of hospitalization for infection in people with diabetes (1,6) which is increasingly due to COVID-19 (7).

The published evidence to date that RAS inhibitor use may be beneficial in this way is inconsistent. A meta-analysis of general population studies found a 34% reduction in pneumonia with ACEi, close to the 36% protection with any RAS

inhibitor in the current study, but no significant benefit with ARB use (9). The only diabetes-specific study, a retrospective study involving the large U.K. General Practice Research Database, found a smaller but still significant protective effect of 28% with ACEi, but ARB were not considered, there was no differentiation by type of diabetes, and there was limited availability of confounding variables (11). A recent Taiwanese study showed that ARB were more effective than ACEi in preventing pneumonia in COPD (10), and we were concerned that this finding may be relevant to type 2 diabetes because of the progressive, largely restrictive, pulmonary dysfunction that has been consistently reported (12). Nevertheless, despite the conflicting results for ARB in previous studies (9,10), we found that ARB and ACEi had similar effects in our well-characterized cohort of people with type 2 diabetes.

Although there is evidence that the combination of ACEi and ARB is beneficial for proteinuria (26) and heart failure (27), there are also adverse effects including acute kidney injury (AKI), hyperkalemia, and hypotension (28). Consistent with studies in other countries (29,30), 1 in 13 of our participants who were taking an RAS inhibitor were on combination therapy. This subgroup appeared, within the limitations of a small sample size and thus low statistical power, to have benefits to similar to those of monotherapy for prevention of pneumonia/influenza (a 40%, nonsignificant, reduction). Guidelines conventionally recommend temporary cessation of RAS inhibitor therapy during intercurrent illness such as pneumonia/influenza because of the risk of AKI and its sequelae, but the justification for this practice has been questioned (31). We did not have detailed data concerning inpatient and postdischarge management including RAS inhibitor use but did not find a significant difference in mortality by prior ACEi/ARB treatment status including at 30 days after discharge.

The other significant independent predictors of first hospitalization for, or death from, pneumonia/influenza in our multivariable models were consistent with those reported previously in studies of pneumonia in both the general population (13,32–34) and population with diabetes (3), including age, Australian indigenous ethnicity, overweight, chronic renal disease and albuminuria,

**Table 2—Baseline associates of incident hospitalization for or with or death from or with pneumonia or influenza in FDS2 participants with type 2 diabetes**

|                                                | No pneumonia/influenza | Incident pneumonia/influenza | P      |
|------------------------------------------------|------------------------|------------------------------|--------|
| Number (%)                                     | 1,308 (88.3)           | 174 (11.7)                   |        |
| Age (years)                                    | 65.1 ± 11.3            | 70.3 ± 12.1                  | <0.001 |
| Male (%)                                       | 51.4                   | 52.9                         | 0.75   |
| Education beyond primary level (%)             | 87.9                   | 76.5                         | <0.001 |
| Not fluent in English (%)                      | 10.2                   | 14.4                         | 0.11   |
| Married/de facto relationship (%)              | 63.6                   | 52.9                         | 0.008  |
| Ethnic background (%)                          |                        |                              |        |
| Anglo-Celt                                     | 54.1                   | 47.7                         | 0.005  |
| Southern European                              | 12.5                   | 13.8                         |        |
| Other European                                 | 6.7                    | 8.6                          |        |
| Asian                                          | 4.7                    | 2.3                          |        |
| Aboriginal/TSI                                 | 6.3                    | 14.4                         |        |
| Mixed/other                                    | 15.7                   | 13.2                         |        |
| Smoking status (%)                             |                        |                              |        |
| Never                                          | 43.3                   | 35.8                         | 0.13   |
| Former                                         | 46.3                   | 50.9                         |        |
| Current                                        | 10.3                   | 13.3                         |        |
| Alcohol consumption (standard drinks/day)      | 0.1 [0–1.2]            | 0.1 [0–0.9]                  | 0.024  |
| Age at diabetes diagnosis (years)              | 55.4 ± 11.9            | 56.9 ± 14.1                  | 0.17   |
| Diabetes duration (years)                      | 8.0 [2.1–15.4]         | 14.1 [6.0–19.1]              | <0.001 |
| Diabetes treatment (%)                         |                        |                              |        |
| Lifestyle/diet                                 | 25.1                   | 17.2                         | 0.002  |
| OGLM                                           | 54.1                   | 50.6                         |        |
| Insulin alone                                  | 4.9                    | 10.3                         |        |
| Insulin+ OGLM                                  | 15.9                   | 21.8                         |        |
| HbA <sub>1c</sub> (%)                          | 7.1 [6.1–8.7]          | 7.5 [6.1–9.5]                | 0.16   |
| HbA <sub>1c</sub> (mmol/mol)                   | 54 [43–72]             | 58 [54–80]                   | 0.16   |
| Fasting serum glucose (mmol/L)                 | 6.8 [6.2–7.7]          | 7.1 [6.3–8.0]                | 0.015  |
| ABSI (m <sup>11/6</sup> · kg <sup>-2/3</sup> ) | 0.081 ± 0.005          | 0.083 ± 0.005                | <0.001 |
| BMI (kg/m <sup>2</sup> )                       | 31.2 ± 6.0             | 31.1 ± 6.4                   | 0.79   |
| Heart rate (bpm)                               | 69 ± 12                | 74 ± 14                      | <0.001 |
| Supine systolic blood pressure (mmHg)          | 146 ± 21               | 148 ± 25                     | 0.28   |
| Supine diastolic blood pressure (mmHg)         | 80 ± 12                | 78 ± 14                      | 0.040  |
| Antihypertensive medication (%)                | 74.3                   | 77.9                         | 0.35   |
| ACEi/ARB use (%)                               | 66.4                   | 63.2                         | 0.44   |
| Total serum cholesterol (mmol/L)               | 4.4 ± 1.1              | 4.2 ± 1.1                    | 0.10   |
| Serum HDL cholesterol (mmol/L)                 | 1.24 ± 0.34            | 1.19 ± 0.36                  | 0.08   |
| Serum triglycerides (mmol/L)                   | 1.5 (0.9–2.5)          | 1.6 (1.0–2.6)                | 0.25   |
| Lipid-lowering medication (%)                  | 69.0                   | 71.5                         | 0.54   |
| Aspirin (%)                                    | 37.3                   | 42.1                         | 0.24   |
| Urinary ACR (mg/mmol)                          | 3.0 (0.8–11.1)         | 6.8 (1.4–34.1)               | <0.001 |
| eGFR category (%)                              |                        |                              |        |
| ≥90 mL/min/1.73 m <sup>2</sup>                 | 39.9                   | 23.6                         | <0.001 |
| 60–89 mL/min/1.73 m <sup>2</sup>               | 46.0                   | 37.9                         |        |
| 45–59 mL/min/1.73 m <sup>2</sup>               | 8.5                    | 13.2                         |        |
| 30–44 mL/min/1.73 m <sup>2</sup>               | 3.8                    | 15.5                         |        |
| <30 mL/min/1.73 m <sup>2</sup>                 | 1.8                    | 9.8                          |        |
| Any retinopathy (%)                            | 36.2                   | 47.0                         | 0.008  |
| Peripheral sensory neuropathy (%)              | 57.1                   | 69.5                         | 0.002  |
| Prior coronary heart disease (%)               | 27.4                   | 44.8                         | <0.001 |
| Prior cerebrovascular disease (%)              | 7.3                    | 17.8                         | <0.001 |
| Peripheral arterial disease (%)                | 21.8                   | 29.3                         | 0.034  |
| CCI (%)                                        |                        |                              |        |
| 0                                              | 78.3                   | 48.9                         | <0.001 |
| 1–2                                            | 15.4                   | 31.6                         |        |
| 3+                                             | 6.3                    | 19.5                         |        |

Continued on p. 2118

Table 2—Continued

|                                               | No pneumonia/influenza  | Incident pneumonia/influenza | P      |
|-----------------------------------------------|-------------------------|------------------------------|--------|
| Prior pneumonia/influenza hospitalization (%) | 1.8                     | 9.2                          | <0.001 |
| Influenza vaccination within last year (%)    | 70.6 (n = 1,261)        | 82.9 (n = 158)               | 0.001  |
| Pneumonia vaccination within last 5 years (%) | 40.7 (n = 1,245)        | 57.4 (n = 155)               | <0.001 |
| FVC (% predicted)                             | 86.9 ± 17.7 (n = 1,210) | 80.2 ± 17.5 (n = 136)        | <0.001 |
| FEV <sub>1</sub> (% predicted)                | 83.7 ± 18.7 (n = 1,210) | 76.7 ± 19.7 (n = 136)        | <0.001 |
| FEV <sub>1</sub> /FVC (%)                     | 78.1 ± 1.9 (n = 1,210)  | 77.4 ± 1.9 (n = 136)         | <0.001 |

Data are means ± SD, geometric means (SD range), or median [interquartile range] unless otherwise indicated. FEV<sub>1</sub>, forced expiratory volume in 1 s; FVC, forced vital capacity; OGLM, oral glucose-lowering medications and noninsulin injectables; TSI, Torres Strait Islander.

prior hospitalization for respiratory infection, proton pump inhibitor therapy, and glycemic control. Smoking and COPD are other recognized risk factors in general population studies (13) but not in the current study. However, COPD is likely to have been captured under CCI categories, or resting pulse rate (35), especially as pulmonary function was not a significant predictor in our models, while the low rate of smoking in our participants (less than one in eight) may have obscured an association. The inverse association with diastolic blood pressure and, by implication, a wide pulse pressure may indicate an association with cardiovascular disease that has been inconsistent in general population studies (13). Participants whose ethnicity was from parts of Europe other than the U.K./Ireland and Southern European countries had an increased risk of pneumonia/influenza that reflects regional European general

population differences (36). Neither pneumococcal nor influenza vaccination was predictive, reflecting general population studies (13).

There is debate as to whether use of ACEi/ARB prescribed for conventional indications may facilitate the COVID-19 infection and its complications or, alternatively, confer cardiorespiratory protection (37), but most guidelines recommend that they not be stopped as a precaution (38). In addition, available information suggests that, although COVID-19 itself causes pneumonia, secondary bacterial pulmonary infection may complicate up to one-half of fatal cases (39). The present data provide some support for maintaining ACEi or ARB therapy in patients at risk or those with mild symptoms who are at low risk of AKI due to fluid loss (31).

The current study had limitations. The FDS data were observational, but there is little evidence that estimates of intervention

effects in well-conducted observational studies are consistently larger than, or qualitatively different from, those from randomized controlled trials (40). We did not examine dose-response relationships, as our aim was to assess whether usual-care ACEi/ARB prescription was associated with pneumonia/influenza hospitalizations and deaths. The choice of dose will depend on tolerability as well as cardiovascular and renal indications, which are independent of infection concerns. Independent associates of baseline ACEi/ARB use were largely consistent with cardiovascular/renal indications and warnings/contraindications that were not directly linked to infection, thus minimizing the risk of confounding by indication. The strengths of the current study include the prospective design, large patient numbers, detailed assessments, and ascertainment of end points through validated data linkage.

Table 3—Models of independent baseline predictors of first incident hospitalization for or with or death from or with pneumonia or influenza

|                                                                                          | Cox model, csHR (95% CI) | P      | Fine and Gray model, sdHR (95% CI) | P      |
|------------------------------------------------------------------------------------------|--------------------------|--------|------------------------------------|--------|
| Age at study entry (increase of 1 year)                                                  | 1.05 (1.03, 1.06)        | <0.001 | 1.04 (1.02, 1.06)                  | <0.001 |
| Australian Aboriginal ethnicity                                                          | 2.60 (1.44, 4.67)        | 0.001  | 2.04 (1.15, 3.64)                  | 0.016  |
| Other European ethnicity <sup>a</sup>                                                    | 1.82 (1.03, 3.20)        | 0.039  | 1.83 (1.05, 3.16)                  | 0.032  |
| HbA <sub>1c</sub> (increase of 1% or 11 mmol/mol)                                        | 1.16 (1.04, 1.29)        | 0.006  | 1.18 (1.06, 1.31)                  | 0.002  |
| ABSI (increase of 10 <sup>-3</sup> for units of m <sup>11/6</sup> · kg <sup>-2/3</sup> ) | 1.04 (1.01, 1.07)        | 0.011  | 1.03 (0.996, 1.06)                 | 0.090  |
| Heart rate (increase of 1 bpm)                                                           | 1.02 (1.01, 1.03)        | 0.001  | 1.02 (1.004, 1.03)                 | 0.011  |
| Diastolic blood pressure (increase of 1 mmHg)                                            | 0.98 (0.97, 0.995)       | 0.007  | 0.98 (0.97, 0.997)                 | 0.016  |
| ln(urinary ACR [mg/mmol]) <sup>b</sup>                                                   | 1.19 (1.06, 1.33)        | 0.003  | 1.18 (1.05, 1.33)                  | 0.005  |
| eGFR <sup>c</sup> 30–44 mL/min/1.73 m <sup>2</sup>                                       | 2.02 (1.28, 3.20)        | 0.003  | 2.03 (1.27, 3.24)                  | 0.003  |
| eGFR <sup>c</sup> <30 mL/min/1.73 m <sup>2</sup>                                         | 2.52 (1.31, 4.87)        | 0.006  | 1.73 (0.83, 3.61)                  | 0.145  |
| PPI use                                                                                  | 1.48 (1.05, 2.10)        | 0.027  | 1.43 (1.00, 2.05)                  | 0.050  |
| CCI <sup>d</sup> 1 or 2                                                                  | 2.19 (1.51, 3.18)        | <0.001 | 1.98 (1.34, 2.91)                  | 0.001  |
| CCI <sup>d</sup> ≥3                                                                      | 2.42 (1.52, 3.86)        | <0.001 | 2.08 (1.25, 3.46)                  | 0.005  |
| Prior hospitalization for/with pneumonia or influenza                                    | 2.67 (1.44, 4.98)        | 0.002  | 1.76 (0.94, 3.33)                  | 0.079  |
| ACEi or ARB use                                                                          | 0.64 (0.45, 0.89)        | 0.008  | 0.67 (0.48, 0.95)                  | 0.024  |

PPI, proton pump inhibitor. <sup>a</sup>European other than Anglo-Celt and Southern European. <sup>b</sup>A 2.72-fold increase in ACR corresponds with an increase of 1 in ln(ACR). <sup>c</sup>Using eGFR ≥45 mL/min/1.73 m<sup>2</sup> as reference. <sup>d</sup>Using CCI of 0 as reference.



The present data represent a robust extension and clarification of published studies examining the relationship between ACEi/ARB use and lower respiratory infections in the context of type 2 diabetes. The detailed nature of FDS2 data permits the beneficial effects of RAS inhibitor therapies to be assessed independently of important confounding variables, while we have also allowed for time-dependent use of these therapies and the competing risk of death. Our findings suggest that prevention of pneumonia/influenza in people with diabetes may represent a novel indication for these therapies, especially in situations such as the current COVID-19 pandemic where pulmonary infections are a particular concern.

**Acknowledgments.** The authors thank the FDS2 staff, investigators, and participants, the staff at the West Australian Data Linkage Branch, the Hospital Morbidity Data Collection, the Registry for Births, Deaths and Marriages, National Coronal Information System, and the Victorian Department of Justice and Community Safety for use of cause of death unit record file data.

**Funding.** The current study was funded by the National Health and Medical Research Council of Australia (project grants 513781 and 1042231). T.M.E.D. is supported by a Medical Research Future Fund Practitioner Fellowship.

The funding bodies had no involvement in the study design, data collection, analysis and interpretation of results, or writing of this manuscript.

**Duality of Interest.** No potential conflicts of interest relevant to this article were reported.

**Author Contributions.** T.M.E.D., principal investigator of the FDS2, conceived the study, provided clinical interpretation, and produced the final version of the manuscript. W.A.D., a co-investigator of the FDS2, provided statistical advice and edited the manuscript. T.M.E.D. is the guarantor of this work and, as such, had full access to all the data in the study and takes responsibility for the integrity of the data and the accuracy of the data analysis.

## References

- Hamilton EJ, Martin N, Makepeace A, Sillars BA, Davis WA, Davis TM. Incidence and predictors of hospitalization for bacterial infection in community-based patients with type 2 diabetes: the Fremantle diabetes study. *PLoS One* 2013;8:e60502
- Muller LM, Gorter KJ, Hak E, et al. Increased risk of common infections in patients with type 1 and type 2 diabetes mellitus. *Clin Infect Dis* 2005;41:281–288
- Thomsen RW, Mor A. Diabetes and risk of community-acquired respiratory tract infections, urinary tract infections, and bacteremia. *Open Infect Dis J* 2012;6(Suppl. 1):27–39
- Zoppini G, Fedeli U, Schievano E, et al. Mortality from infectious diseases in diabetes. *Nutr Metab Cardiovasc Dis* 2018;28:444–450
- Harding JL, Pavkov ME, Magliano DJ, Shaw JE, Gregg EW. Global trends in diabetes complications: a review of current evidence. *Diabetologia* 2019;62:3–16
- Harding JL, Benoit SR, Gregg EW, Pavkov ME, Perreault L. Trends in rates of infections requiring hospitalization among adults with versus without diabetes in the U.S., 2000–2015. *Diabetes Care* 2020;43:106–116
- Guan WJ, Liang WH, Zhao Y, et al.; China Medical Treatment Expert Group for COVID-19. Comorbidity and its impact on 1590 patients with COVID-19 in China: a nationwide analysis. *Eur Respir J* 2020;55:2000547
- Tan WSD, Liao W, Zhou S, Mei D, Wong WF. Targeting the renin-angiotensin system as novel therapeutic strategy for pulmonary diseases. *Curr Opin Pharmacol* 2018;40:9–17
- Caldeira D, Alarcão J, Vaz-Carneiro A, Costa J. Risk of pneumonia associated with use of angiotensin converting enzyme inhibitors and angiotensin receptor blockers: systematic review and meta-analysis. *BMJ* 2012;345:e4260
- Lai CC, Wang YH, Wang CY, Wang HC, Yu CJ, Chen L. Comparative effects of angiotensin-converting enzyme inhibitors and angiotensin II receptor blockers on the risk of pneumonia and severe exacerbations in patients with COPD. *Int J Chron Obstruct Pulmon Dis* 2018;13:867–874
- van de Garde EM, Souverein PC, Hak E, Deneer VH, van den Bosch JM, Leufkens HG. Angiotensin-converting enzyme inhibitor use and protection against pneumonia in patients with diabetes. *J Hypertens* 2007;25:235–239
- Visca D, Pignatti P, Spanevello A, Lucini E, La Rocca E. Relationship between diabetes and respiratory diseases-clinical and therapeutic aspects. *Pharmacol Res* 2018;137:230–235
- Almirall J, Serra-Prat M, Bolibar I, Balasso V. Risk factors for community-acquired pneumonia in adults: a systematic review of observational studies. *Respiration* 2017;94:299–311
- American Diabetes Association. 10. Cardiovascular disease and risk management: Standards of Medical Care in Diabetes—2020. *Diabetes Care* 2020;43(Suppl. 1):S111–S134
- Davis TM, Bruce DG, Davis WA. Cohort profile: the Fremantle Diabetes Study. *Int J Epidemiol* 2013;42:412–421
- Davis WA, Peters KE, Makepeace A, et al. Prevalence of diabetes in Australia: insights from the Fremantle Diabetes Study Phase II. *Intern Med J* 2018;48:803–809
- Davis TM, Makepeace AE, Ellard S, et al. The prevalence of monogenic diabetes in Australia: the Fremantle Diabetes Study Phase II. *Med J Aust* 2017;207:344–347
- Krakauer NY, Krakauer JC. Anthropometrics, metabolic syndrome, and mortality hazard. *J Obes* 2018;2018:9241904
- Davis WA, Knuiman M, Kendall P, Grange V, Davis TM; Fremantle Diabetes Study. Glycemic exposure is associated with reduced pulmonary function in type 2 diabetes: the Fremantle Diabetes Study. *Diabetes Care* 2004;27:752–757
- Norman PE, Davis WA, Bruce DG, Davis TM. Peripheral arterial disease and risk of cardiac death in type 2 diabetes: the Fremantle Diabetes Study. *Diabetes Care* 2006;29:575–580
- Levey AS, Bosch JP, Lewis JB, Greene T, Rogers N, Roth D; Modification of Diet in Renal Disease Study Group. A more accurate method to estimate glomerular filtration rate from serum creatinine: a new prediction equation. *Ann Intern Med* 1999;130:461–470
- Holman CD, Bass AJ, Rosman DL, et al. A decade of data linkage in Western Australia: strategic design, applications and benefits of the WA data linkage system. *Aust Health Rev* 2008;32:766–777
- Skull SA, Andrews RM, Byrnes GB, et al. ICD-10 codes are a valid tool for identification of pneumonia in hospitalized patients aged > or = 65 years. *Epidemiol Infect* 2008;136:232–240
- Charlson ME, Pompei P, Ales KL, MacKenzie CR. A new method of classifying prognostic comorbidity in longitudinal studies: development and validation. *J Chronic Dis* 1987;40:373–383
- Fine JP, Gray RJ. A proportional hazards model for the subdistribution of a competing risk. *J Am Stat Assoc* 1999;94:496–509
- Kunz R, Friedrich C, Wolbers M, Mann JF. Meta-analysis: effect of monotherapy and combination therapy with inhibitors of the renin angiotensin system on proteinuria in renal disease. *Ann Intern Med* 2008;148:30–48
- Lee VC, Rhew DC, Dylan M, Badamgarav E, Braunstein GD, Weingarten SR. Meta-analysis: angiotensin-receptor blockers in chronic heart failure and high-risk acute myocardial infarction [published correction appears in *Ann Intern Med* 2005;42:391]. *Ann Intern Med* 2004;141:693–704
- Feng Y, Huang R, Kavanagh J, et al. Efficacy and safety of dual blockade of the renin-angiotensin-aldosterone system in diabetic kidney disease: a meta-analysis. *Am J Cardiovasc Drugs* 2019;19:259–286
- Lin CC, Wu YT, Yang WC, et al. Angiotensin receptor blockers are associated with lower mortality than ACE inhibitors in predialytic stage 5 chronic kidney disease: a nationwide study of therapy with renin-angiotensin system blockade. *PLoS One* 2017;12:e0189126
- McAlister FA, Zhang J, Tonelli M, Klarenbach S, Manns BJ, Hemmelgarn BR; Alberta Kidney Disease Network. The safety of combining angiotensin-converting-enzyme inhibitors with angiotensin-receptor blockers in elderly patients: a population-based longitudinal analysis. *CMAJ* 2011;183:655–662
- Tomson C, Tomlinson LA. Stopping RAS inhibitors to minimize AKI: more harm than good? *Clin J Am Soc Nephrol* 2019;14:617–619
- Basnayake TL, Morgan LC, Chang AB. The global burden of respiratory infections in indigenous children and adults: a review. *Respirology* 2017;22:1518–1528
- Nie W, Zhang Y, Jee SH, Jung KJ, Li B, Xiu Q. Obesity survival paradox in pneumonia: a meta-analysis. *BMC Med* 2014;12:61
- Ishigami J, Grams ME, Chang AR, Carrero JJ, Coresh J, Matsushita K. CKD and risk for hospitalization with infection: the Atherosclerosis Risk in Communities (ARIC) study. *Am J Kidney Dis* 2017;69:752–761

35. Jensen MT, Marott JL, Lange P, et al. Resting heart rate is a predictor of mortality in COPD. *Eur Respir J* 2013;42:341–349
36. Welte T, Torres A, Nathwani D. Clinical and economic burden of community-acquired pneumonia among adults in Europe. *Thorax* 2012;67:71–79
37. Danser AHJ, Epstein M, Batlle D. Renin-angiotensin system blockers and the COVID-19 pandemic: at present there is no evidence to abandon renin-angiotensin system blockers. *Hypertension* 2020;75:1382–1385
38. Bozkurt B, Kovacs R, Harrington B. HFSA/ACC/AHA statement addresses concerns re: using RAAS antagonists in COVID-19 [article online]. Available from <https://www.acc.org/latest-in-cardiology/articles/2020/03/17/08/59/hfsa-acc-aha-statement-addresses-concerns-re-using-raas-antagonists-in-covid-19>. Accessed April 2020
39. Du RH, Liang LR, Yang CQ, et al. Predictors of mortality for patients with COVID-19 pneumonia caused by SARS-CoV-2: a prospective cohort study. *Eur Respir J* 2020;55:2000524
40. Benson K, Hartz AJ. A comparison of observational studies and randomized, controlled trials. *N Engl J Med* 2000;342:1878–1886
